# Supplementary material for: Exploring the Potential of Iminosugars as Antivirals for Crimean-Congo Haemorrhagic Fever Virus, Using the Surrogate Hazara Virus: Liquid-Chromatography-Based Mapping of Viral N-Glycosylation and In Vitro Antiviral Assays
Source: MDPI journal article supplement (doi:10.3390/pathogens12030399), 2023-03-01
Supplement: s1 [file s1]

Supplementary Tables and Figures for:

**Exploring the Potential of Iminosugars as Antivirals for Crimean-Congo Haemorrhagic Fever Virus, Using the Surrogate Hazara Virus: Liquid-Chromatography-Based Mapping of Viral N-Glycosylation and In Vitro Antiviral Assays**

Beatrice E. Tyrrell, Abhinav Kumar, Bevin Gangadharan, Dominic Alonzi, Juliane Brun, Michelle Hill, Tehmina Bharucha, Andrew Bosworth, Victoria Graham, Stuart Dowall, Joanna L. Miller and Nicole Zitzmann

Correspondence to: [nicole.zitzmann@bioch.ox.ac.uk](mailto:nicole.zitzmann@bioch.ox.ac.uk)

**Supplementary Table S1.** O-glycosylation prediction of HAZV and CCHFV. Scores from the NetOGlyc 4.0 Server (DTU Bioinformatics, University of Denmark). A total of 14 sites on HAZV and 90 sites on CCHFV had O-glycosylation potentials above a threshold of 0.7. The gradation of colours relate to the O-glycosylation score where the highest scores are shown in darker green, lowest scores are in darker red and scores in between are in yellow. In both viruses, the O-glycosylation potential is highest in the mucin-like variable region.

| Chain                      | HAZV     |          | CCHFV    |          |
|----------------------------|----------|----------|----------|----------|
|                            | Position | Score    | Position | Score    |
| Mucin-like variable region | 22       | 0.827772 | 23       | 0.931262 |
|                            | 24       | 0.829553 | 27       | 0.972228 |
|                            | 28       | 0.959723 | 32       | 0.966068 |
|                            | 29       | 0.969206 | 34       | 0.952545 |
|                            | 33       | 0.975653 | 36       | 0.965209 |
|                            | 34       | 0.918613 | 37       | 0.988626 |
|                            |          |          | 43       | 0.977169 |
|                            |          |          | 44       | 0.980107 |
|                            |          |          | 49       | 0.965769 |
|                            |          |          | 50       | 0.939262 |
|                            |          |          | 53       | 0.875142 |
|                            |          |          | 55       | 0.968651 |
|                            |          |          | 59       | 0.992849 |
|                            |          |          | 60       | 0.978914 |
|                            |          |          | 62       | 0.987548 |
|                            |          |          | 64       | 0.986252 |
|                            |          |          | 65       | 0.994089 |
|                            |          |          | 68       | 0.93942  |
|                            |          |          | 73       | 0.905363 |
|                            |          |          | 78       | 0.959212 |
|                            |          |          | 79       | 0.974422 |
|                            |          |          | 83       | 0.971223 |
|                            |          |          | 84       | 0.956699 |
|                            |          |          | 86       | 0.927088 |
|                            |          |          | 90       | 0.982535 |
|                            |          |          | 92       | 0.974401 |
|                            |          |          | 93       | 0.978733 |
|                            |          |          | 99       | 0.989353 |
|                            |          |          | 100      | 0.977282 |
|                            |          |          | 102      | 0.903175 |
|                            |          |          | 104      | 0.939893 |
|                            |          |          | 106      | 0.973813 |
|                            |          |          | 113      | 0.98995  |
|                            |          |          | 114      | 0.943063 |
|                            |          |          | 116      | 0.988119 |
|                            |          |          | 120      | 0.988506 |
|                            |          |          | 121      | 0.993504 |

|      |     |          |     |          |
|------|-----|----------|-----|----------|
|      |     |          | 124 | 0.996035 |
|      |     |          | 127 | 0.97703  |
|      |     |          | 128 | 0.981646 |
|      |     |          | 132 | 0.993158 |
|      |     |          | 134 | 0.99748  |
|      |     |          | 135 | 0.981392 |
|      |     |          | 137 | 0.99253  |
|      |     |          | 138 | 0.985115 |
|      |     |          | 142 | 0.973401 |
|      |     |          | 151 | 0.932734 |
|      |     |          | 153 | 0.976887 |
|      |     |          | 154 | 0.990018 |
|      |     |          | 160 | 0.975784 |
|      |     |          | 161 | 0.96955  |
|      |     |          | 162 | 0.977372 |
|      |     |          | 164 | 0.976607 |
|      |     |          | 166 | 0.924413 |
|      |     |          | 170 | 0.987979 |
|      |     |          | 171 | 0.963666 |
|      |     |          | 173 | 0.970329 |
|      |     |          | 174 | 0.978832 |
|      |     |          | 175 | 0.982323 |
|      |     |          | 180 | 0.995965 |
|      |     |          | 185 | 0.993082 |
|      |     |          | 189 | 0.972056 |
|      |     |          | 194 | 0.981983 |
|      |     |          | 198 | 0.939476 |
|      |     |          | 202 | 0.979987 |
|      |     |          | 207 | 0.942452 |
|      |     |          | 209 | 0.930992 |
|      |     |          | 211 | 0.987156 |
|      |     |          | 213 | 0.9466   |
|      |     |          | 218 | 0.913611 |
|      |     |          | 219 | 0.977484 |
|      |     |          | 221 | 0.9736   |
|      |     |          | 228 | 0.990185 |
|      |     |          | 230 | 0.982063 |
|      |     |          | 233 | 0.939943 |
|      |     |          | 237 | 0.970974 |
|      |     |          | 240 | 0.973973 |
|      |     |          | 242 | 0.982473 |
| GP38 | 113 | 0.738189 | 323 | 0.771324 |
|      |     |          | 326 | 0.933441 |
|      |     |          | 329 | 0.938859 |
|      |     |          | 330 | 0.949821 |
|      |     |          | 332 | 0.983169 |

|                             |     |          |      |          |
|-----------------------------|-----|----------|------|----------|
|                             |     |          | 333  | 0.94856  |
|                             |     |          | 339  | 0.759312 |
|                             |     |          | 378  | 0.726875 |
|                             |     |          | 381  | 0.936315 |
|                             |     |          | 382  | 0.876265 |
|                             |     |          | 387  | 0.823809 |
| Non-Structural protein<br>M | 633 | 0.856664 |      |          |
|                             | 638 | 0.76701  |      |          |
|                             | 679 | 0.903456 |      |          |
|                             | 683 | 0.911063 |      |          |
|                             | 685 | 0.828454 |      |          |
|                             | 698 | 0.756311 |      |          |
| Gc                          | 894 | 0.875082 | 1399 | 0.771154 |

CCHFV, Crimean-Congo haemorrhagic fever virus; HAZV, Hazara virus.

**Supplementary Table S2.** Sites predicted to be N-glycosylated in the HAZV glycoprotein (UniProtKB accession number A6XIP3) using GlycoEP (N-linked glycosylation prediction based on binary profile of patterns using default SVM 0.0 thresholds. The darker the green colour for the score cells, the higher the score. N41 and N159 were excluded due to the prolines (P) in the sequons and since the scores were very low.

| Position | Sequon            | Score |
|----------|-------------------|-------|
| 41       | N <sup>P</sup> PS | 0.189 |
| 97       | NSS               | 1.069 |
| 159      | N <sup>P</sup> PS | 0.33  |
| 346      | NGS               | 0.637 |
| 639      | NQS               | 1.23  |
| 1081     | NST               | 0.919 |
| 1299     | NET               | 0.801 |

HAZV, Hazara virus.

**Supplementary Figure S1.** N-glycosylation prediction of HAZV. Modified output from the NetNGlyc 1.0 Server (DTU Bioinformatics, University of Denmark). Default settings were used where predictions were done only on the Asn-Xaa-Ser/Thr sequons. All Asn-Pro-Ser/Thr sequons were excluded and the remaining sequons were included for sequence alignment. A total of eight Asn-Xaa-Ser/Thr sequons were identified (highlighted in blue). Three of these were Asn-Pro-Ser/Thr sequons (Asn shown in red at N41, N159 and N930) which were excluded. Two sequons (Asn shown in orange at N639 and N1299) were below the N-glycosylation potential threshold of 0.5 (at 0.4717 and 0.4993 respectively) with long tryptic peptides and therefore were not considered for analysis by mass spectrometry but were included in the sequence alignment to see if CCHFV has potential N-glycosylation sites which align with these sequons of HAZV. The remaining three sequons (Asn shown in green at N97, N346 and N1081) were considered to have potential N-glycosylation sites and were selected for further analysis by mass spectrometry.

Asn-Xaa-Ser/Thr sequons in the sequence output below are highlighted in blue.

Asparagines predicted to be N-glycosylated are highlighted in green.

Output for HAZV glycoprotein sequence (Uniprot accession number A6XIP3)

| Name: HAZV glycoprotein                                                           | Length: 1421 |  |
|-----------------------------------------------------------------------------------|--------------|--|
| MEGSYWWLSLLALLAWGANGESTSPAETSPAPTTNPPVVP                                          | 80           |  |
| NANELKLRLADFFIDTNSQCYDEILVKKPCSSSLTPAHNSHWVPRGLDKSEVDKIFDTKLKLFFSQSRKVTCLSASALNP  | 160          |  |
| SQFVKHFQVKIQETSGPAKQSLRSLHCVNLVWSHSHKGEKEVVHVLQSAVPVKLKNCLAMLNFRQCYYNQQSEGPVVVPS  | 240          |  |
| YQHNGEKWVTGAYTMTVEVDKHADGPCEISTTCITEGSEIKPGVHSLRGFKTTLVIHGKRNTGRRLLSSSNARQECSSGT  | 320          |  |
| FLGEGGSAQVVGPKNDGPGDHITFCNSVVTKIRLGQEHGCTVRRIKTYRNCRPEEGSSACEVDDELKPCGAQKCMNVH    | 400          |  |
| LSVKGLVKTSRGSNVQVHSCDKDCLIQIPEGFGDIQIDCPGGTQHYLESNVLDVDCPMYNRLGGLMLYFCRMSHRPRTCL  | 480          |  |
| ALFIWLGAGYGITCIAGYMVYYAILALSMLTRCLKRKYMVGDFCLKCEQKCVTSLDQTLHDESCSYNICPYCGNRLPEE   | 560          |  |
| GLRRHVPSCPKRKQRLEEIDLYLDYLLVPCPLHFASTAVKLGTLKRLSWVTVFLCLFLTAIAPVQGQVTTSPVLPSNQ    | 640          |  |
| STECTLLPPPVLIFSAVLMSKTLKRMGPVNVKGAAGHSARNTNSPKNLYKSKQIANTKSGPREPRRRVVVKALLILTAS   | 720          |  |
| SALQSIHLAQAFDSGSLPEGAWEEMQLVQGCNQECSELEDECSGPDGQSMTRKLLFFKGLNSAASKMASSHRLTTSVSI   | 800          |  |
| DTPWGAIKVESTYKPRLASSNIQLAWNSIEEQGDKVILSGKSTSIKLEEKTMQWSLGSESAEEKRLLVSILDYTTQVY    | 880          |  |
| SSTFQYITGDRTVSEWPKATCTGDCPDRCGCTSSCLYKSWPHSRNWRCNPTWCWGVGTGCTCCGVDILRPFNKYFVTKW   | 960          |  |
| TTEYVRTDVLVCVELTDQERHCDVVEAGSQFVIGPVRVVVSDPQNVQTKLPSEILTIQKLEGNQVVDIMHATSIVSAKNA  | 1040         |  |
| CKLQSCTHGSPGDMQILHTDNLQIHSQDGLNLADLNPLVNSTWMSWEGCDLDYYCTTGSWPSCYTGTGINSENTESFDNL  | 1120         |  |
| LNTESNLCERFHFHHSKRISASGSTLQMDLKGRPNSSGGELSVLVDVKGLELHSHKISLKGSLFKTLSCSGCYACSSGLSC | 1200         |  |
| TVEVRIERPDEFTVHLRSVPDIAVAEGSI IARRMTGGPLSRLRAFAVRKVKKICFEIVEKSYCKDKNEDTTKCI EVEL  | 1280         |  |
| QPPKDILLEHKGTTIKRQNETCVSGLQCWTESASSFVSGVGSFFRNYLGSITLGIVLTLLPVAVVLLFFCYGDKLFLKCS  | 1360         |  |
| CFRCCRGLSRGKVRKELDEDELNRNKLKFKSKEGELFGKEKKDARTIALLLSGKGKNYKELV                    |              |  |

```

..... 80
.....N..... 160
..... 240
..... 320
.....N..... 400
..... 480
..... 560
..... 640
..... 720
..... 800
..... 880
..... 960
..... 1040
.....N..... 1120
..... 1200
..... 1280
..... 1360
..... 1440

```

(Threshold=0.5)

| SeqName | Position  | Potential | Jury<br>agreement | N-Glyc<br>result |                  |
|---------|-----------|-----------|-------------------|------------------|------------------|
| HAZV    | 41 NPSL   | 0.6857    | (9/9)             | ++               | WARNING: PRO-X1. |
| HAZV    | 97 NSSQ   | 0.6163    | (8/9)             | +                |                  |
| HAZV    | 159 NPSQ  | 0.7756    | (9/9)             | +++              | WARNING: PRO-X1. |
| HAZV    | 346 NGSV  | 0.5580    | (7/9)             | +                |                  |
| HAZV    | 639 NQST  | 0.4717    | (7/9)             | -                |                  |
| HAZV    | 930 NPTW  | 0.5820    | (8/9)             | +                | WARNING: PRO-X1. |
| HAZV    | 1081 NSTW | 0.5839    | (8/9)             | +                |                  |
| HAZV    | 1299 NETC | 0.4993    | (5/9)             | -                |                  |

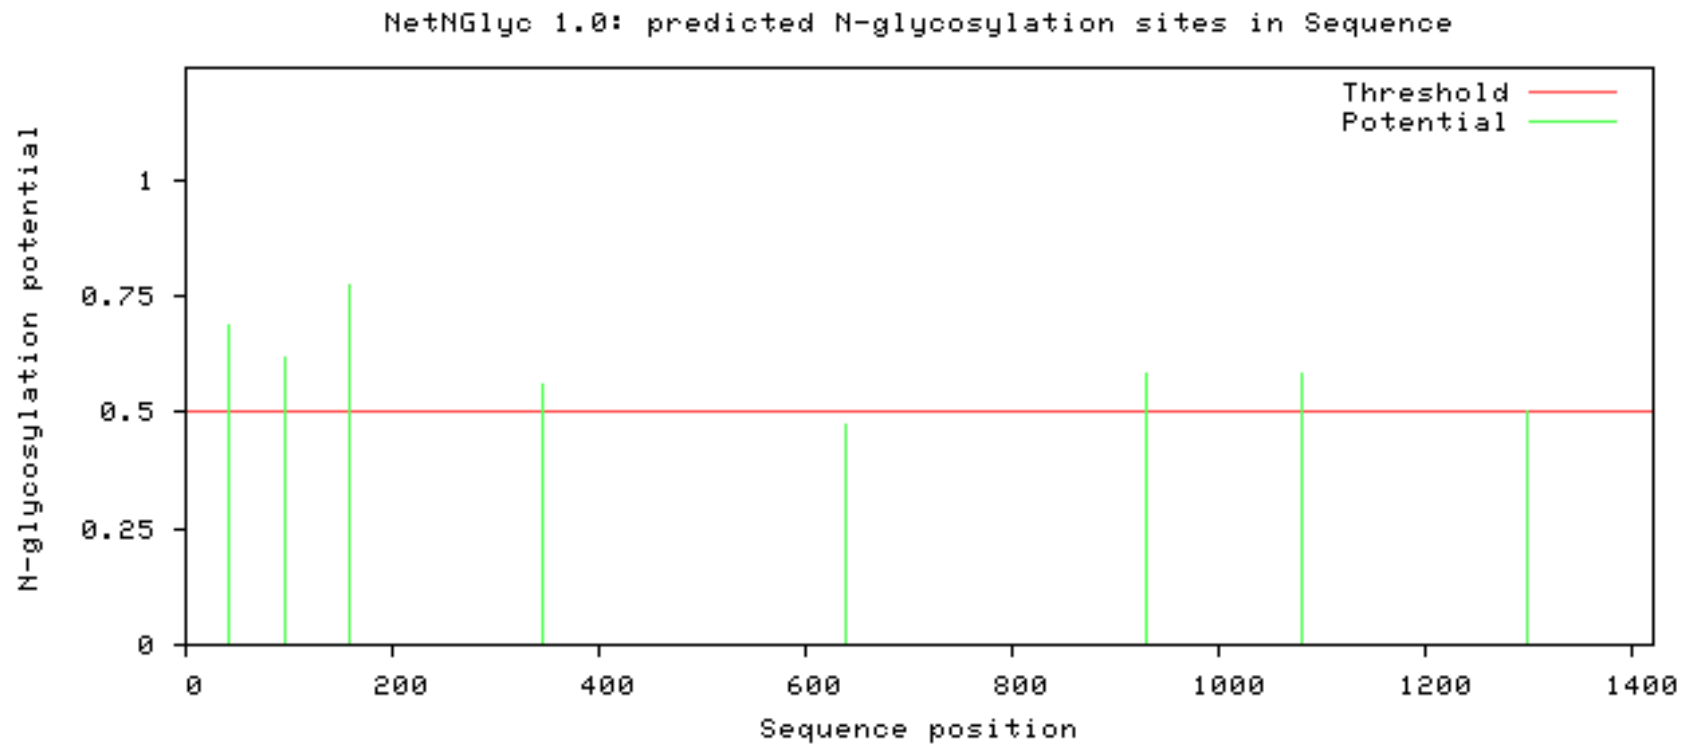

CCHFV, Crimean-Congo haemorrhagic fever virus; HAZV, Hazara virus.

**Supplementary Figure S2.** Sequence alignment of CCHFV (strain Nigeria / IbAr10200 / 1970; Uniprot Q8JSZ3) with HAZV glycoprotein (Uniprot A6XIP3). Chains are as currently shown on Uniprot (Release 12-Oct-2022). All HAZV glycoprotein peptides identified by mass spectrometry are shown in bold.

Mucin-like variable region

GP38

Glycoprotein N

## Non-Structural protein M

Glycoprotein C

Propeptide

N = Potential N-glycosylation sites (as shown in Uniprot for CCHF/HAZV and as predicted by NetNGlyc 1.0 and GlycoEP for HAZV).

Underlined = Tryptic peptides covering N-glycosylation sites.

**Bold in blue** = Peptides identified in 84 kDa band.

**Bold in green** = Peptides identified in 45 kDa band.

**Bold in yellow** = Peptides identified in 30 kDa band.

HAZARA = Hazara virus glycoprotein (Uniprot A6XIP3)

CCHFV = Crimean-Congo hemorrhagic fever virus Envelopment  
polyprotein strain Nigeria / IbAr10200 / 1970 (Uniprot Q8JSZ3)

CCHFV

10 20  
MHISLMYAILCLQLCGLGETHGS

SHNE

30 40 50 60 70 80

CCHFV

TRHNKTDMTTPGDNPSSSEPPVSTALSITLDPSTVTPPTTPASGLEGSGEVYTSPPIITGS

90 100 110 120 130 140

CCHFV

LPLSETTPELPVTTGTDLTLSAGDVPSTQTAGGTSAPTVRTSLPNSPSTPSTPQDTHHPV

150 160 170 180 190 200

CCHFV

RNLLSVTSPGPDETSTPSGTGKESSATSSPHPVSNRPPTPPATAQGPTENDSHNATEHPE

210 220 230 240 250 260

CCHFV

SLTQSATPGLMTSPTQIVHPQSATPITVQDTHPSPTNRSKRNLKMEIILTLSQLKYYG

:

HAZARA

MEGSYWWSLLALLAWGANGESTSPAETSPAPTTNPPVVNPSLRRKIVNO

|        |                                                                    |     |     |     |     |     |
|--------|--------------------------------------------------------------------|-----|-----|-----|-----|-----|
|        | 10                                                                 | 20  | 30  | 40  | 50  |     |
| CCHFV  | 270                                                                | 280 | 290 | 300 | 310 | 320 |
|        | KILRLQLTLEEDTEGLLEWCKRNLGLDCDDTFFQKRIEEFFITGEGH--FNEVLQFRTP        |     |     |     |     |     |
|        | .: : . . . . . : . : . . . . . : . . . . .                         |     |     |     |     |     |
| HAZARA | 60                                                                 | 70  | 80  | 90  | 100 | 110 |
|        | RILSAMGMSDPSNEALNGVCQSIHSNGCNANELKRLADFFIDTNSQCYDEILVKKPC          |     |     |     |     |     |
| CCHFV  | 330                                                                | 340 | 350 | 360 | 370 | 380 |
|        | GTLSTTEST--PAGLPTAEPFKSYFAKGFLSIDSGYISAKCYSGTSNSGLQLINITRHS        |     |     |     |     |     |
|        | .: : . . . . . : : : . : . : . : . : . : . : . : . : . : .         |     |     |     |     |     |
| HAZARA | 120                                                                | 130 | 140 | 150 | 160 |     |
|        | SSLTPAHNSHWVPRGLDKSEVDKIFDTKLKLF-SQSRKVTCLSASALNPSQFVK--HFQ        |     |     |     |     |     |
| CCHFV  | 390                                                                | 400 | 410 | 420 | 430 | 440 |
|        | TRIVDTPGPKITNLKTINCINLKASIFKEHREVEINVLLPQAVVLSNCHVVIKSHVCDY        |     |     |     |     |     |
|        | .: : : : . . . . . : . . . . . : : : : . . . . . : : : . : : .     |     |     |     |     |     |
| HAZARA | 170                                                                | 180 | 190 | 200 | 210 | 220 |
|        | VKIQETSGPAKQSLRSLHCVNLVWSHSHKGEKEVVHVLSAVPVKLKNCLAMLNFRQCY         |     |     |     |     |     |
| CCHFV  | 450                                                                | 460 | 470 | 480 | 490 | 500 |
|        | SLDIDGAVRLPHIYHEGV-FIPGTYKIVIDKKNKLNDRCTLFDCVIKGREVRKGQSVLR        |     |     |     |     |     |
|        | . . . : : : : : : . . : : . . . : . : : . : : : : : : : : : : .    |     |     |     |     |     |
| HAZARA | 230                                                                | 240 | 250 | 260 | 270 | 280 |
|        | NQQSEGPVVVPSYQHNGEKWVTGAYTMTVEVDKHADGPCEISTTCITEGSEIKPGVHSLR       |     |     |     |     |     |
| CCHFV  | 510                                                                | 520 | 530 | 540 | 550 |     |
|        | QYKTEIRI-GKASTGSRLL-SEEPSDDCISRTQLLRRTETAETAEIHGDNYGGPGDKITICNGS   |     |     |     |     |     |
|        | .: : . : : : : : : : . . . : : : : . . . . : . : : : : : : : : : . |     |     |     |     |     |
| HAZARA | 290                                                                | 300 | 310 | 320 | 330 | 340 |
|        | GFKTTLVINGKNTG-RRLLSSSNARQECSSGTFLGEGGSAQVVGPKNDGPGDHITFCNGS       |     |     |     |     |     |
| CCHFV  | 560                                                                | 570 | 580 | 590 | 600 | 610 |
|        | TIVDQRLGSELGCYTINRVRSFKLCENSATGKNCEIDSVPVKCRQGYCLRITQEGRGHVK       |     |     |     |     |     |
|        | . . . : : : : : : . . . . . : . . . . . : . . . . . : . . . . .    |     |     |     |     |     |
| HAZARA | 350                                                                | 360 | 370 | 380 | 390 | 400 |
|        | VVTKIRLQGHEHCYTVRRIKTYRNCRPEEGSSACEVDDELKPCGAQKCMNVHLSVKGLVK       |     |     |     |     |     |
| CCHFV  | 620                                                                | 630 | 640 | 650 | 660 | 670 |
|        | LSRGSEVVLDAEDTSCEIMIPKGTGDILVDCSGGQQHFLKDNLIDLGCPKIPLLGKMAIY       |     |     |     |     |     |
|        | .: : : . . : . : : : : : : : : : : : : : : : : : : : : : : .       |     |     |     |     |     |
| HAZARA | 410                                                                | 420 | 430 | 440 | 450 | 460 |
|        | TSRGSNVQVHSCDKDCLIQIPEGFGDIQIDCPGGTQHYLESNVLDVDCPMYNRLGGLMLY       |     |     |     |     |     |
| CCHFV  | 680                                                                | 690 | 700 | 710 | 720 | 730 |
|        | ICRMSNHPKTTMAFLWFWSFGYVITCILCKAIFYLLIIVGTLGKRLKQYRELKPQTCTIC       |     |     |     |     |     |
|        | .: : : : : : : : : : : : : : : : . . . . . : . . . : . : . : .     |     |     |     |     |     |
| HAZARA | 470                                                                | 480 | 490 | 500 | 510 | 520 |
|        | FCRMSHRPRTCLALFIWLGAGYGITCIAGYMVYYAILALSMLTRCLRKRYMVKGDFCLKC       |     |     |     |     |     |
| CCHFV  | 740                                                                | 750 | 760 | 770 | 780 | 790 |
|        | ETTPVNAIDAEMHDLNCSYNICPYCASRLTSDGLARHVIQCPKRKEKVEETELYNLERI        |     |     |     |     |     |
|        | : . . . . : . : : : : : : : : : . : : : : : : : : : : : .          |     |     |     |     |     |
| HAZARA | 530                                                                | 540 | 550 | 560 | 570 | 580 |
|        | EQKCVTSLDQTLHDESCSYNICPYCGNRLPEEGLRRHVPSCPKRKQRLEEIDLYLDYLLV       |     |     |     |     |     |



|        | 1080       | 1090                  | 1100        | 1110           | 1120       | 1130               |
|--------|------------|-----------------------|-------------|----------------|------------|--------------------|
| HAZARA | DLNPLV     | STWMSWEGCDLDYYCTTGSWP | SCTYTGINS   | ENTESFDNLLNTES | NLCER      | FHFH               |
| CCHFV  | SKRVT      | TAHGDT                | PQLDLKARPT  | YGAGEITV       | LVEVADME   | LHTKKIEISGLKFAS    |
| HAZARA | SKRISASG   | STLQMDLK              | GRPNSGGGELS | SVLVDVKGLELH   | SKKISLKG   | LSFKTLSCSGCYAC     |
| CCHFV  | SSGISCKVRI | HVDEPDELTV            | HVKSDDPDV   | VAASSSLMARK    | LEFGTDST   | FKAFSAMPKTSI       |
| HAZARA | SSGLSCTVE  | VRIERPDEFT            | VHLRSVSPDIA | VAEGSIIARRMT   | GGPLSRLRA  | FAVRKVKKI          |
| CCHFV  | CFYIVEREH  | CKSCSEEDTK            | KCVNTKLEQ   | PQSILIEHKG     | GTIIKG     | NSTCTAKASCWLESVK   |
| HAZARA | CFEIVEK    | SYCKDCKNED            | TTKCIEVELQ  | PPKDILLEHKG    | GTIIKRONET | CVSGLQCWTESAS      |
| CCHFV  | SFFYGLKN   | MLSGIFGNV             | FMGIFLFLAP  | FILLILFFMFG    | ---        | WRILFCFKCCRTRGLFKY |
| HAZARA | SFVSGVGS   | FFRNYLGSIT            | LGIVLTL     | LPVAVLLFF      | FCYGDKLF   | KLCSCFRCC---RGLSRG |
| CCHFV  | RHLKDDEET  | GYRRIIEK              | LNNKKGK     | NKLLDGER       | LADRRIAEL  | FSTKTHIG           |
| HAZARA | KVRKELDE   | ELRNKLK               | KFS-KEGE--  | LFGKEKK        | DARTIAL    | LLSGKGKNYKELV      |

CCHFV, Crimean-Congo haemorrhagic fever virus; HAZV, Hazara virus.

**Supplementary Figure S3.** Example of MS/MS spectrum (from Mascot) of peptide NDGPGDHITFCNGSVVTK ( $m/z$  640.291500, 3+) with deamidation on N346 confirming that this site is occupied in HAZV.

Gn.MS/MS Fragmentation of **NDGPGDHITFCNGSVVTK**  
Found in [gi|111154390](#) in **NCBI**nr, glycoprotein precursor [Hazara virus]

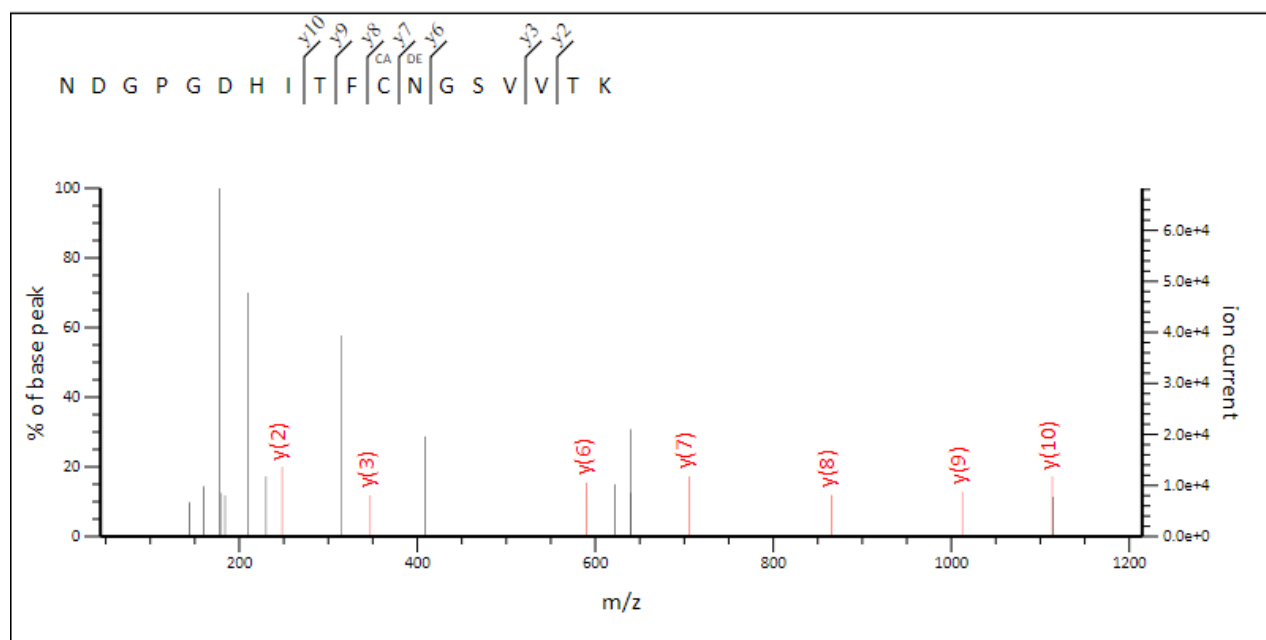

**Monoisotopic mass of neutral peptide Mr(calc):** 1917.8527

**Variable modifications:**

**C11** : Carbamidomethyl (C)

**N12** : Deamidated (N) **Ions Score:** 39 **Expect:** 0.00021

**Matches** : 7/252 fragment ions using 13 most intense peaks

| Score | Mr(calc)  | Delta   | Sequence                           |
|-------|-----------|---------|------------------------------------|
| 39.2  | 1917.8527 | -0.0001 | <a href="#">NDGPGDHITFCNGSVVTK</a> |

HAZV, Hazara virus; MS, mass spectrometry.

**Supplementary Figure S4.** Uninfected and HAZV-infected SW13 cells are susceptible to iminosugar-mediated ER  $\alpha$ -glucosidase inhibition. SW13 cells (assayed in technical duplicate) were left untreated or treated with 100  $\mu$ M 2THO-DNJ, NB-DNJ, NB-DGJ or ribavirin, or 316  $\mu$ M NB-DNJ or NB-DGJ for 3 days (**A, B**) or 6 days (**C, D**). In (**A, B**), cells were either mock- or HAZV-infected on day 0, immediately prior to drug treatment. In (**C, D**), cells were drug-treated for 3 days prior to mock- or HAZV-infection, after which the same drug treatment was continued for 3 days. At the end of the culture period, cells were lysed and FOS species purified and detected by NP-HPLC.

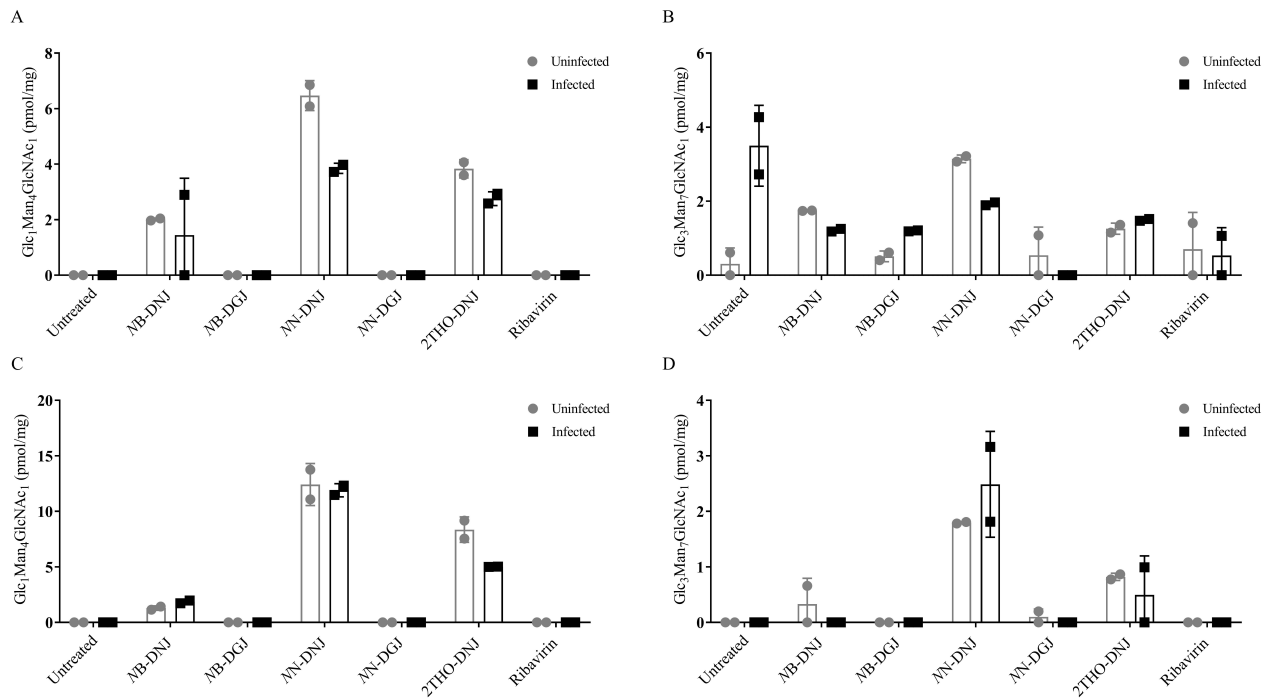

2THO-DNJ, *N*-8'-(2''-tetrahydrofuranyl)-octyl-deoxynojirimycin; ER, endoplasmic reticulum; FOS, free oligosaccharide; HAZV, Hazara virus; NB-DGJ, *N*-butyl-deoxygalactojirimycin; NB-DNJ, *N*-butyl-deoxynojirimycin; MN-DGJ, MN-deoxygalactonojirimycin; MN-DNJ, *N*-nonyl-deoxynojirimycin; NP-HPLC, normal phase-high performance liquid chromatography.

**Supplementary Figure S5.** Cytotoxicity of iminosugars and ribavirin in SW13 (A) and Vero cells (B). SW13 and Vero cells (assayed in technical quadruplicate) were treated with drug as indicated for 3 days prior to cell viability assessment by MTS assay. Data were normalised to untreated and represented as mean  $\pm$  standard deviation.

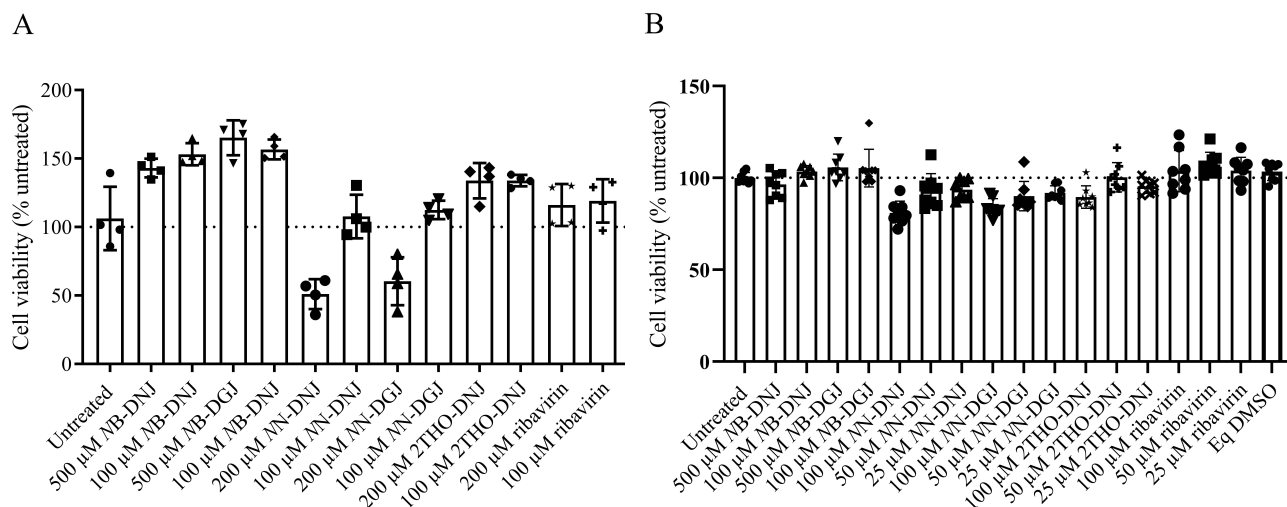

2THO-DNJ, *N*-8'-(2''-tetrahydrofuranyl)-octyl-deoxynojirimycin; MTS, 3-(4,5-dimethyl-2-yl)-5-(3-carboxymethoxyphenyl)-2-(4-sulfophenyl)-2H-tetrazolium; NB-DGJ, *N*-butyl-deoxygalactojirimycin; NB-DNJ, *N*-butyl-deoxynojirimycin; NN-DGJ, *NN*-deoxygalactonojirimycin; NN-DNJ, *NN*-nonyl-deoxynojirimycin.

**Supplementary Figure S6.** Uninfected Vero cells are susceptible to iminosugar-mediated ER  $\alpha$ -glucosidase inhibition. Vero cells (assayed in technical triplicate) were left untreated or treated with 316  $\mu$ M NB-DNJ, NB-DGJ or 100  $\mu$ M ribavirin for 3 days. At the end of the culture period, cells were lysed and FOS species purified and measured by NP-HPLC. (A) Glc<sub>1</sub>Man<sub>4</sub>GlcNAc<sub>1</sub> and (B) Glc<sub>3</sub>Man<sub>7</sub>GlcNAc<sub>2</sub> FOS species were detected: these are diagnostic for ER  $\alpha$ -glucosidase II and I inhibition, respectively. These were normalised to total protein content and plotted as mean  $\pm$  standard deviation.

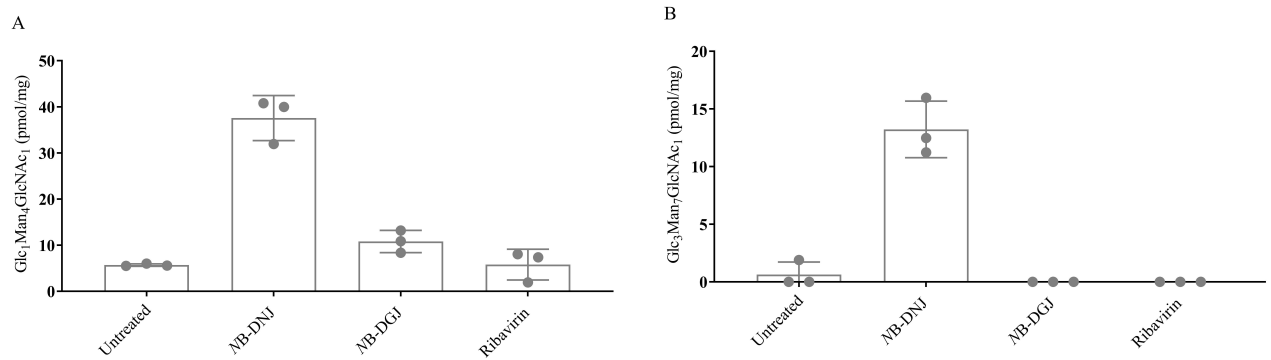

ER, endoplasmic reticulum; FOS, free oligosaccharide; NB-DGJ, *N*-butyl-deoxygalactojirimycin; NB-DNJ, *N*-butyl-deoxynojirimycin; NP-HPLC, normal phase-high performance liquid chromatography.
